# Supplementary material
Source: PubMed Central journal article supplement (PMC11376935)
Supplement: PBI-21-549-s001.pdf [file PBI-21-549-s001.pdf]

| SARS-CoV-2 Variant       | WA1/2020 | B.1.617.2 (Delta) | B.1.1.529 (Omicron) |
|--------------------------|----------|-------------------|---------------------|
| IC <sub>90</sub> (mg/ml) | 0.91     | 1.28              | 5.62                |

**Table S1: Neutralization potency (IC<sub>90</sub>) of p11D7 against various SARS-CoV-2 variants.**

Serial dilutions of p11D7 were mixed with the indicated SARS-CoV-2 variant before adding to Vero E6 (WA1/2020 and Delta) or Vero-hACE2-TMPRSS2 (Omicron) cells. Cells were then fixed, permeabilized, and stained for SARS-CoV-2 protein. Foci were counted, percent neutralization determined, and IC<sub>90</sub> calculated using GraphPad Prism 9. At least two independent experiments were performed with technical triplicates.
